# Supplementary material
Source: PubMed Central journal article supplement (PMC3784652)
Supplement: NIHMS505686-supplement-Supplementary_On-Line_Material.pdf [file NIHMS505686-supplement-Supplementary_On-Line_Material.pdf]

| Variable                           | Usual Care |                       | NEP |                       | SRC |                                                          |
|------------------------------------|------------|-----------------------|-----|-----------------------|-----|----------------------------------------------------------|
|                                    | n          | MEAN +/- ste          | n   | MEAN +/- ste          | n   | MEAN +/- ste                                             |
| <b>DEALING WITH ILLNESS</b>        |            |                       |     |                       |     |                                                          |
| Active Behavioral Coping           |            |                       |     |                       |     |                                                          |
| Baseline                           | 58         | 59.0±1.2              | 52  | 62.0±1.3              | 53  | 63.5±1.3 <sup>y</sup>                                    |
| 4-Month Change                     | 57         | 59.2±1.2              | 48  | 62.8±1.3              | 53  | 62.5±1.3                                                 |
| Radiation                          |            | 58.8±1.5              |     |                       |     | <b>63.1±1.6<sup>y</sup> (0.047)</b>                      |
| 1-Year Change                      | 48         | 56.8±1.3 <sup>x</sup> | 50  | 61.1±1.3              | 47  | 62.4±1.3 <sup>y</sup>                                    |
| Radiation                          |            | 56.6±1.5              |     |                       |     | 62.9±1.7 <sup>y</sup> (0.005)                            |
| 2-Year Change                      | 48         | 58.3±1.3              | 44  | 59.5±1.3 <sup>x</sup> | 50  | 60.5±1.3 <sup>x</sup>                                    |
| Active Cognitive Coping            |            |                       |     |                       |     |                                                          |
| BASELINE                           | 58         | 60.9±1.0              | 52  | 61.7±1.1              | 53  | 62.2±1.1                                                 |
| 4-Month Change                     | 57         | 59.2±1.0 <sup>x</sup> | 48  | 62.5±1.1              | 53  | 63.5±1.1 <sup>y</sup>                                    |
| Radiation                          |            | 58.6±1.2              |     |                       |     | 64.8±1.4 <sup>y</sup> (0.0006)                           |
| 1-Year Change                      | 48         | 58.9±1.1 <sup>x</sup> | 50  | 60.4±1.1              | 47  | 61.7±1.1                                                 |
| Radiation                          |            | 58.2±1.3              |     |                       |     | <b>62.6±1.4<sup>y</sup> (0.019)</b>                      |
| 2-Year Change                      | 48         | 59.6±1.1              | 44  | 58.8±1.1 <sup>x</sup> | 50  | 61.8±1.1                                                 |
| Radiation                          |            |                       |     | 57.8±1.4              |     | <b>62.8±1.4<sup>z</sup> (0.012)</b>                      |
| Avoidance Coping*                  |            |                       |     |                       |     |                                                          |
| BASELINE                           | 58         | 27.3±0.8              | 52  | 28.7±0.8              | 53  | 27.6±0.8                                                 |
| 4-Month Change                     | 57         | 27.5±0.8              | 48  | 28.1±0.8              | 53  | 25.9±0.8 <sup>x</sup>                                    |
| Radiation                          |            | 26.7±0.9              |     | 28.0±1.0              |     | <b>24.1±1.0<sup>y</sup> (0.042)<sup>z</sup> (0.0038)</b> |
| 1-Year Change                      | 48         | 26.1±0.8              | 50  | 27.6±0.8              | 47  | 26.2±0.8 <sup>x</sup>                                    |
| 2-Year Change                      | 48         | 26.7±0.8              | 44  | 26.2±0.8 <sup>x</sup> | 50  | 26.1±0.8 <sup>x</sup>                                    |
| <b>FUNCTIONAL ASSESSMENT CA TX</b> |            |                       |     |                       |     |                                                          |
| Social-Family Well-Being           |            |                       |     |                       |     |                                                          |
| BASELINE                           | 58         | 21.8±0.6              | 52  | 21.1±0.6              | 53  | 21.3±0.6                                                 |
| 4-Month Change                     | 57         | 20.8±0.6 <sup>x</sup> | 47  | 20.3±0.6              | 53  | 21.2±0.6                                                 |
| Radiation                          |            |                       |     | 19.8±0.8              |     | <b>22.2±0.7<sup>z</sup> (0.025)</b>                      |
| 1-Year Change                      | 52         | 21.0±0.6              | 52  | 20.8±0.6              | 50  | 21.5±0.6                                                 |
| 2-Year Change                      | 50         | 20.5±0.6 <sup>x</sup> | 45  | 20.6±0.7              | 49  | 21.3±0.6                                                 |
| Emotional Well-Being               |            |                       |     |                       |     |                                                          |
| BASELINE                           | 58         | 17.0±0.3              | 52  | 17.1±0.4              | 53  | 16.2±0.4                                                 |
| 4-Month Change                     | 57         | 16.7±0.3              | 48  | 16.9±0.4              | 53  | 16.9±0.4 <sup>x</sup>                                    |
| Radiation                          |            | 16.9±0.3              |     | 16.7±0.4              |     | <b>18.0±0.4<sup>y</sup> (0.028)<sup>z</sup> (0.015)</b>  |
| 1-Year Change                      | 52         | 17.8±0.4 <sup>x</sup> | 52  | 17.2±0.4              | 50  | 17.1±0.4 <sup>x</sup>                                    |
| 2-Year Change                      | 49         | 17.5±0.4              | 44  | 17.6±0.4              | 49  | 17.3±0.4 <sup>x</sup>                                    |
| SpiritualityEx                     |            |                       |     |                       |     |                                                          |

|                                   |    |                       |    |                       |    |                                                   |
|-----------------------------------|----|-----------------------|----|-----------------------|----|---------------------------------------------------|
| <b>BASELINE</b>                   | 55 | 7.7±0.3               | 47 | 8.0±0.4               | 53 | 7.8±0.3                                           |
| <b>4-Month Change</b>             | 54 | 7.6±0.3               | 44 | 7.3±0.4               | 52 | 8.9±0.3 <sup>x,y,z</sup>                          |
| Radiation                         |    | 7.6±0.4               |    | 6.8±0.5               |    | 8.9±0.4 <sup>y</sup> (0.02) <sup>z</sup> (0.0009) |
| <b>1-Year Change</b>              | 49 | 7.9±0.3               | 47 | 7.6±0.4               | 50 | 8.8±0.3 <sup>x,z</sup>                            |
| Radiation                         |    |                       |    | 7.0±0.5               |    | 8.9±0.4 <sup>z</sup> (0.003)                      |
| <b>2-Year Change</b>              | 48 | 8.1±0.4               | 42 | 8.1±0.4               | 49 | 8.6±0.4 <sup>x</sup>                              |
| <b>SENSE OF COHERENCE SCALE</b>   |    |                       |    |                       |    |                                                   |
| FCM/Comprehensibility             |    |                       |    |                       |    |                                                   |
| <b>BASELINE</b>                   | 56 | 53.9±1.3              | 50 | 52.4±1.4              | 50 | 51.1±1.4                                          |
| <b>4-Month Change</b>             | 54 | 53.3±1.3              | 45 | 51.0±1.4              | 49 | 51.9±1.4                                          |
| <b>1-Year Change</b>              | 48 | 55.5±1.3              | 47 | 52.9±1.4              | 44 | 51.2±1.4 <sup>y</sup>                             |
| Radiation                         |    | 56.0±1.5              |    |                       |    | 52.1±1.7 <sup>y</sup> (0.084)                     |
| <b>2-Year Change</b>              | 47 | 54.6±1.3              | 43 | 52.2±1.4              | 46 | 52.2±1.4                                          |
| MEAN/Meaningfulness               |    |                       |    |                       |    |                                                   |
| <b>BASELINE</b>                   | 56 | 45.5±1.0              | 50 | 45.2±1.0              | 50 | 45.4±1.0                                          |
| <b>4-Month Change</b>             | 54 | 43.7±1.0 <sup>x</sup> | 45 | 43.5±1.1 <sup>x</sup> | 49 | 46.8±1.0 <sup>y,z</sup>                           |
| Radiation                         |    | 43.8±1.2              |    | 42.8±1.3              |    | 47.3±1.3 <sup>y</sup> (<0.05) <sup>z</sup> (0.02) |
| <b>1-Year Change</b>              | 48 | 45.0±1.0              | 47 | 44.6±1.1              | 44 | 46.8±1.1                                          |
| Radiation                         |    |                       |    | 44.1±1.4              |    | <b>48.1±1.4<sup>z</sup> (0.036)</b>               |
| <b>2-Year Change</b>              | 47 | 44.5±1.0              | 43 | 45.2±1.1              | 46 | 47.3±1.1 <sup>x</sup>                             |
| Radiation                         |    | 44.6±1.2              |    |                       |    | <b>48.4±1.3<sup>y</sup> (0.030)</b>               |
| <b>MMAC</b>                       |    |                       |    |                       |    |                                                   |
| Helplessness*                     |    |                       |    |                       |    |                                                   |
| <b>BASELINE</b>                   | 57 | 10.4±0.4              | 52 | 10.6±0.5              | 52 | 11.3±0.5                                          |
| <b>4-Month Change</b>             | 56 | 11.1±0.4              | 47 | 11.6±0.5 <sup>x</sup> | 52 | 10.9±0.5                                          |
| Radiation                         |    |                       |    | 11.7±0.6              |    | <b>10.1±0.6<sup>z</sup> (0.048)</b>               |
| <b>1-Year Change</b>              | 50 | 10.8±0.5              | 51 | 11.5±0.5 <sup>x</sup> | 49 | 11.0±0.5                                          |
| <b>2-Year Change</b>              | 48 | 10.6±0.5              | 45 | 10.5±0.5              | 49 | 10.6±0.5                                          |
| Cognitive Avoidance*              |    |                       |    |                       |    |                                                   |
| <b>BASELINE</b>                   | 57 | 9.2±0.3               | 52 | 9.2±0.3               | 53 | 9.0±0.3                                           |
| <b>4-Month Change</b>             | 56 | 9.3±0.3               | 47 | 9.3±0.3               | 53 | 8.8±0.3                                           |
| Radiation                         |    | 9.4±0.4               |    |                       |    | <b>8.2±0.4<sup>y</sup> (0.029)</b>                |
| <b>1-Year Change</b>              | 50 | 9.5±0.3               | 52 | 9.3±0.3               | 50 | 9.2±0.3                                           |
| <b>2-Year Change</b>              | 48 | 8.8±0.3               | 45 | 8.7±0.3               | 50 | 8.7±0.3                                           |
| <b>SCL-90 (Symptom Checklist)</b> |    |                       |    |                       |    |                                                   |
| Anxiety*                          |    |                       |    |                       |    |                                                   |
| <b>BASELINE</b>                   | 58 | 0.22±0.05             | 52 | 0.29±0.05             | 53 | 0.37±0.05 <sup>y</sup>                            |
| Radiation                         |    | 0.22±0.05             |    |                       |    | 0.28±0.05 <sup>y</sup> (0.42)                     |
| <b>4-Month Change</b>             | 57 | 0.29±0.05             | 48 | 0.27±0.05             | 51 | 0.22±0.05 <sup>x</sup>                            |

|                                          |    |                        |    |                        |    |                                                          |
|------------------------------------------|----|------------------------|----|------------------------|----|----------------------------------------------------------|
| Radiation                                |    | 0.28±0.05              |    |                        |    | <b>0.14±0.05<sup>y</sup> (0.032)</b>                     |
| 1-Year Change                            | 49 | 0.18±0.05              | 50 | 0.23±0.05              | 47 | 0.27±0.05 <sup>x</sup>                                   |
| 2-Year Change                            | 49 | 0.22±0.05              | 45 | 0.21±0.05              | 47 | 0.27±0.05 <sup>x</sup>                                   |
| <b>Hostility*</b>                        |    |                        |    |                        |    |                                                          |
| BASELINE                                 | 58 | 0.24±0.05              | 52 | 0.35±0.05              | 53 | 0.31±0.05                                                |
| 4-Month Change                           | 57 | 0.33±0.05              | 48 | 0.29±0.05              | 51 | 0.14±0.05 <sup>x,y,z</sup>                               |
| Radiation                                |    | 0.32±0.05              |    | 0.26±0.06              |    | 0.12±0.06 <sup>y</sup> (0.008) <sup>-z</sup> (0.077)     |
| 1-Year Change                            | 49 | 0.20±0.05              | 50 | 0.24±0.05              | 47 | 0.18±0.05 <sup>x</sup>                                   |
| 2-Year Change                            | 49 | 0.28±0.05              | 45 | 0.22±0.05 <sup>x</sup> | 47 | 0.18±0.05 <sup>x</sup>                                   |
| <b>Global Severity Index*</b>            |    |                        |    |                        |    |                                                          |
| BASELINE                                 | 58 | 0.37±0.04              | 52 | 0.38±0.04              | 53 | 0.42±0.04                                                |
| 4-Month Change                           | 57 | 0.38±0.04              | 48 | 0.39±0.04              | 51 | 0.29±0.04 <sup>x</sup>                                   |
| Radiation                                |    | 0.36±0.04              |    | 0.36±0.05              |    | <b>0.22±0.05<sup>y</sup> (0.033)<sup>z</sup> (0.039)</b> |
| 1-Year Change                            | 49 | 0.28±0.04 <sup>x</sup> | 50 | 0.34±0.04              | 47 | 0.33±0.04 <sup>x</sup>                                   |
| 2-Year Change                            | 49 | 0.35±0.04              | 45 | 0.30±0.04 <sup>x</sup> | 47 | 0.32±0.04 <sup>x</sup>                                   |
| <b>Depression*</b>                       |    |                        |    |                        |    |                                                          |
| BASELINE                                 | 58 | 0.53±0.07              | 52 | 0.53±0.07              | 53 | 0.65±0.07                                                |
| 4-Month Change                           | 57 | 0.53±0.07              | 48 | 0.61±0.07              | 51 | 0.41±0.07 <sup>x,z</sup>                                 |
| Radiation                                |    |                        |    | 0.58±0.08              |    | 0.31±0.08 <sup>z</sup> (0.02)                            |
| 1-Year Change                            | 49 | 0.34±0.07 <sup>x</sup> | 50 | 0.46±0.07              | 47 | 0.46±0.07 <sup>x</sup>                                   |
| 2-Year Change                            | 49 | 0.44±0.07              | 45 | 0.45±0.07              | 47 | 0.48±0.07 <sup>x</sup>                                   |
| <b>Paranoid Ideation*</b>                |    |                        |    |                        |    |                                                          |
| BASELINE                                 | 58 | 0.23±0.05              | 52 | 0.26±0.05              | 53 | 0.20±0.05                                                |
| 4-Month Change                           | 57 | 0.30±0.05              | 48 | 0.26±0.05              | 51 | 0.15±0.05 <sup>y</sup>                                   |
| Radiation                                |    | 0.26±0.05              |    |                        |    | 0.12±0.05 <sup>y</sup> (0.04)                            |
| 1-Year Change                            | 49 | 0.19±0.05              | 50 | 0.26±0.05              | 47 | 0.25±0.05                                                |
| 2-Year Change                            | 49 | 0.31±0.05              | 45 | 0.20±0.05              | 47 | 0.20±0.05                                                |
| <b>COURTAULD EMOTIONAL CONTROL SCALE</b> |    |                        |    |                        |    |                                                          |
| <b>Anxious*</b>                          |    |                        |    |                        |    |                                                          |
| BASELINE                                 | 54 | 16.6±0.6               | 47 | 16.7±0.6               | 53 | 15.1±0.6                                                 |
| 4-Month Change                           | 52 | 16.0±0.6               | 42 | 16.2±0.6               | 45 | 13.9±0.6 <sup>x,y,z</sup>                                |
| Radiation                                |    | 15.9±0.6               |    | 15.7±0.7               |    | 14.1±0.7 <sup>y</sup> (<0.05) <sup>-z</sup> (0.11)       |
| 1-Year Change                            | 44 | 16.0±0.6               | 44 | 15.4±0.6 <sup>x</sup>  | 46 | 14.9±0.6                                                 |
| 2-Year Change                            | 45 | 16.7±0.6               | 36 | 15.5±0.6               | 48 | 14.8±0.6 <sup>y</sup>                                    |
| Radiation                                |    | 16.4±0.7               |    |                        |    | 14.5±0.7 <sup>y</sup> (0.04)                             |
| <b>Unhappy*</b>                          |    |                        |    |                        |    |                                                          |
| BASELINE                                 | 54 | 15.6±0.6               | 46 | 16.6±0.6               | 53 | 15.2±0.6                                                 |
| 4-Month Change                           | 52 | 15.2±0.6               | 41 | 15.5±0.6 <sup>x</sup>  | 46 | 13.7±0.6 <sup>x,z</sup>                                  |

|                                                                                                                        |    |                       |    |                       |    |                                                  |
|------------------------------------------------------------------------------------------------------------------------|----|-----------------------|----|-----------------------|----|--------------------------------------------------|
| Radiation                                                                                                              |    |                       |    | 15.2±0.7              |    | 13.9±0.7 <sup>z</sup> (0.16)                     |
| <b>1-Year Change</b>                                                                                                   | 42 | 14.7±0.6              | 43 | 14.7±0.6 <sup>x</sup> | 40 | 13.7±0.6 <sup>x</sup>                            |
| <b>2-Year Change</b>                                                                                                   | 42 | 15.6±0.6              | 34 | 15.2±0.7              | 45 | 13.6±0.6 <sup>x,y</sup>                          |
| Radiation                                                                                                              |    | 15.2±0.6              |    |                       |    | 13.8±0.6 <sup>y</sup> (0.09)                     |
| <b>Control*</b>                                                                                                        |    |                       |    |                       |    |                                                  |
| <b>BASELINE</b>                                                                                                        | 54 | 48.1±1.4              | 46 | 48.7±1.5              | 53 | 45.4±1.4                                         |
| <b>4-Month Change</b>                                                                                                  | 52 | 46.4±1.4              | 41 | 46.8±1.5              | 45 | 41.5±1.5 <sup>x,y,z</sup>                        |
| Radiation                                                                                                              |    | 46.3±1.5              |    | 45.7±1.7              |    | 41.7±1.7 <sup>y</sup> (0.04) <sup>z</sup> (0.10) |
| <b>1-Year Change</b>                                                                                                   | 42 | 45.4±1.5 <sup>x</sup> | 42 | 44.5±1.5 <sup>x</sup> | 38 | 43.1±1.5                                         |
| <b>2-Year Change</b>                                                                                                   | 39 | 47.1±1.5              | 33 | 45.3±1.6 <sup>x</sup> | 45 | 42.5±1.5 <sup>x,y</sup>                          |
| Radiation                                                                                                              |    | 46.0±1.6              |    |                       |    | 42.2±1.7 <sup>y</sup> (0.10)                     |
| *Lower score indicates improvement.                                                                                    |    |                       |    |                       |    |                                                  |
| <sup>x</sup> Change from baseline differs from zero (P≤.05).                                                           |    |                       |    |                       |    |                                                  |
| <sup>y</sup> Stress reduction intervention is significantly different from the usual care (P≤.05).                     |    |                       |    |                       |    |                                                  |
| <sup>z</sup> Stress reduction intervention is significantly different from nutritional education intervention (P≤.05). |    |                       |    |                       |    |                                                  |
| <b><i>Bold Italics</i></b> represents a new significance relationship for the radiation treatment subset               |    |                       |    |                       |    |                                                  |
